# Supplementary material for: A conserved folding nucleus sculpts the free energy landscape of bacterial and archaeal orthologs from a divergent TIM barrel family
Source: PubMed Central journal article supplement (PMC8092565; doi:10.1073/pnas.2019571118), 2021-04-19
Supplement: pnas.2019571118.sd01.pdf [file pnas.2019571118.sd01.pdf]

36 - 47 /  $(\alpha_0)\beta_1$

48 - 60 / CL1

61 - 67 /  $CL1\beta_{\alpha 1}$

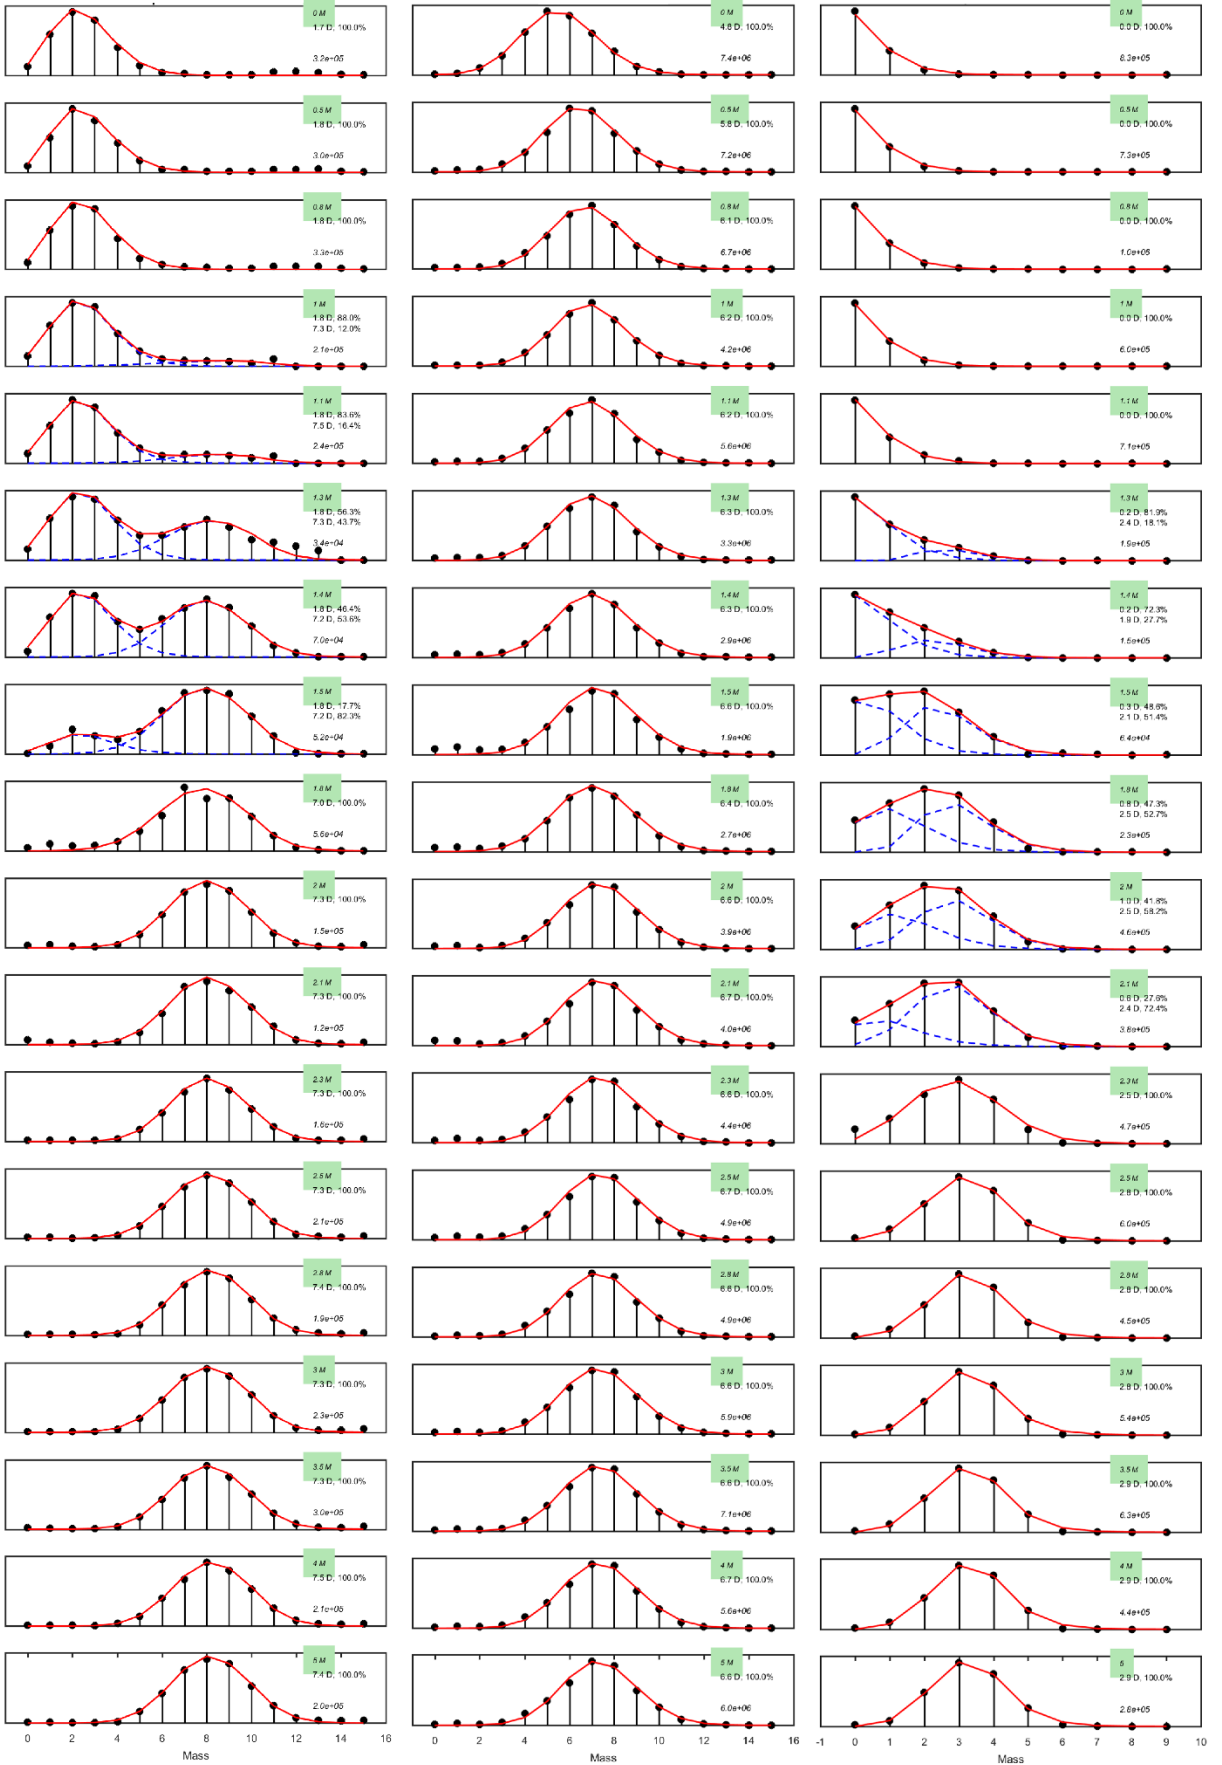

Supplementary Dataset S1

### 75 - 81 / ( $\alpha$ 1) $\beta$ 2

### 82 - 93 / CL2

### 94 - 109 / $\alpha$ 2 $\beta$ 3

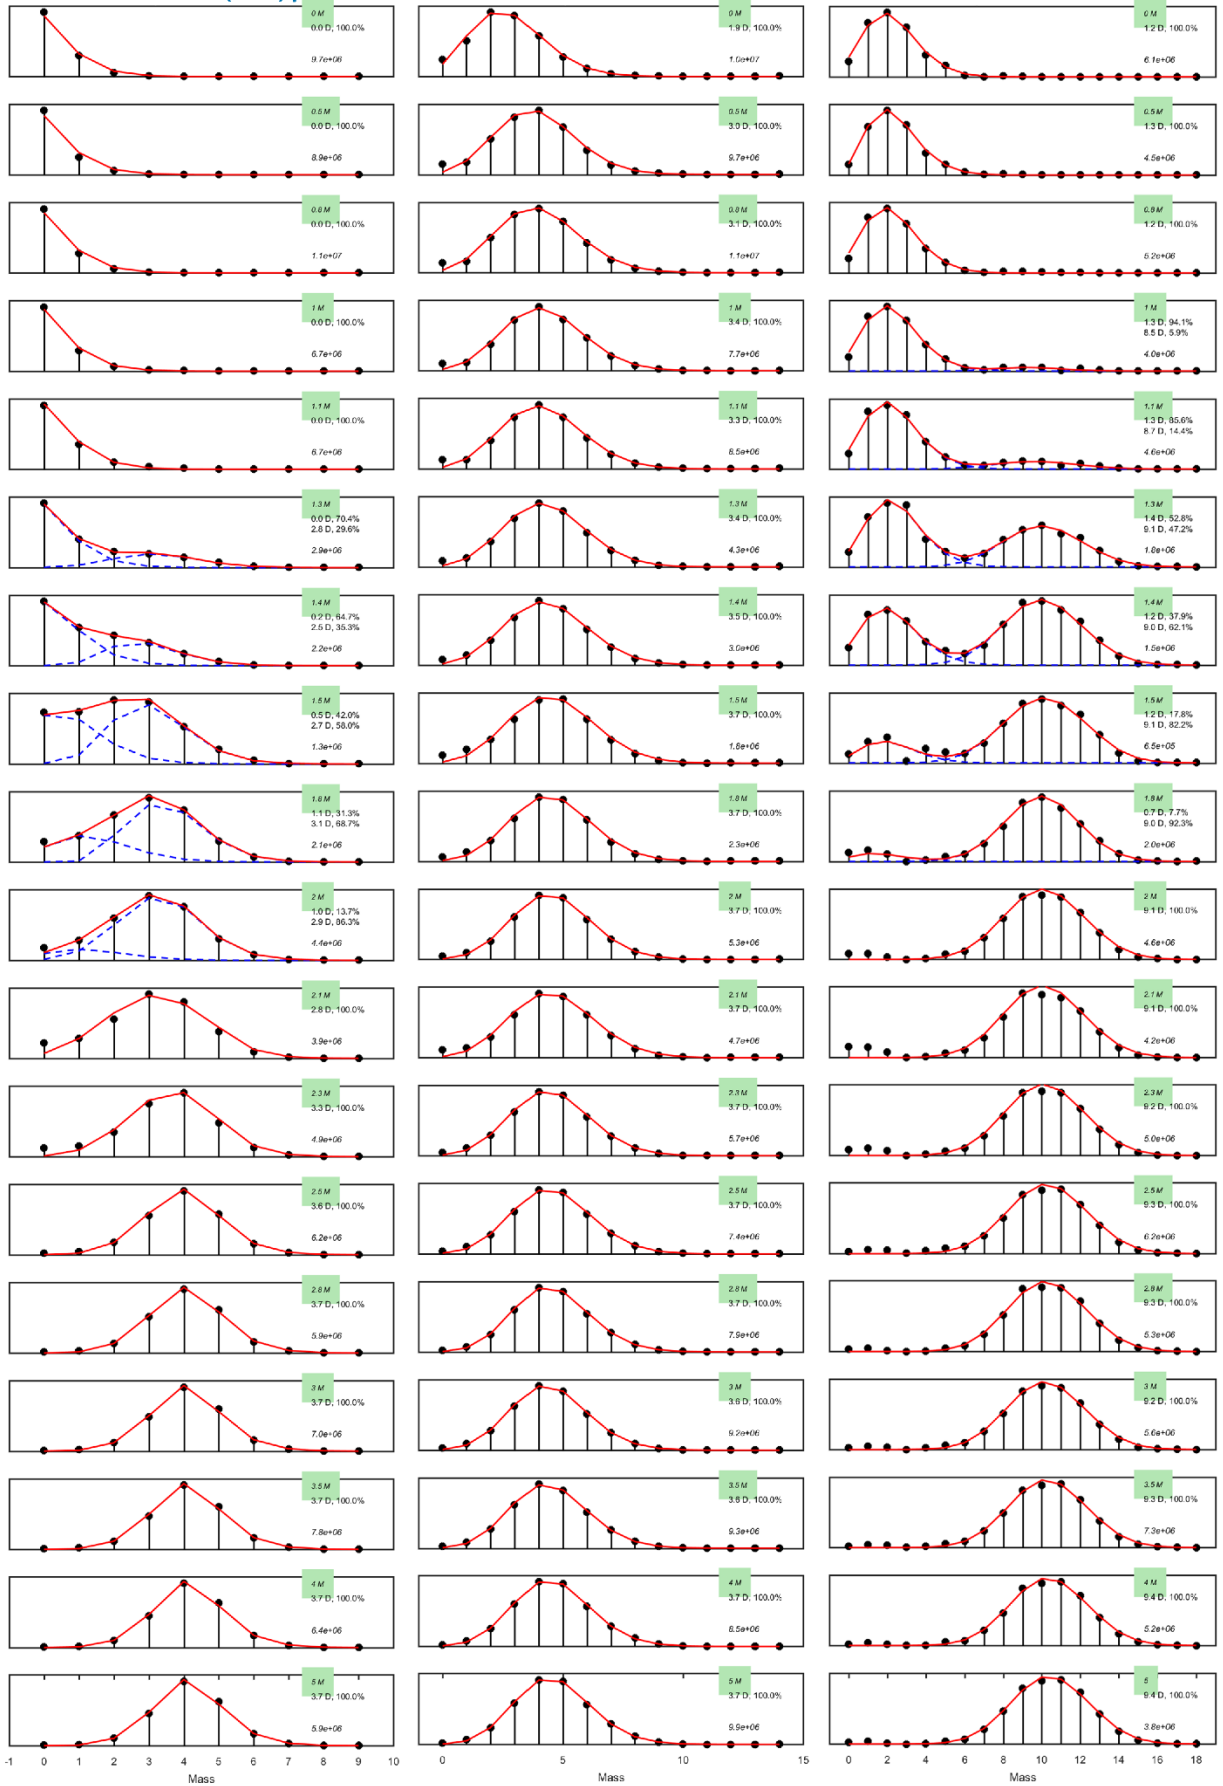

Supplementary Dataset S1

### 117 - 126 / $\alpha_3$

### 117 - 129 / $\alpha_3\beta_4$

### 128 - 139 / $\beta_4\alpha_4$

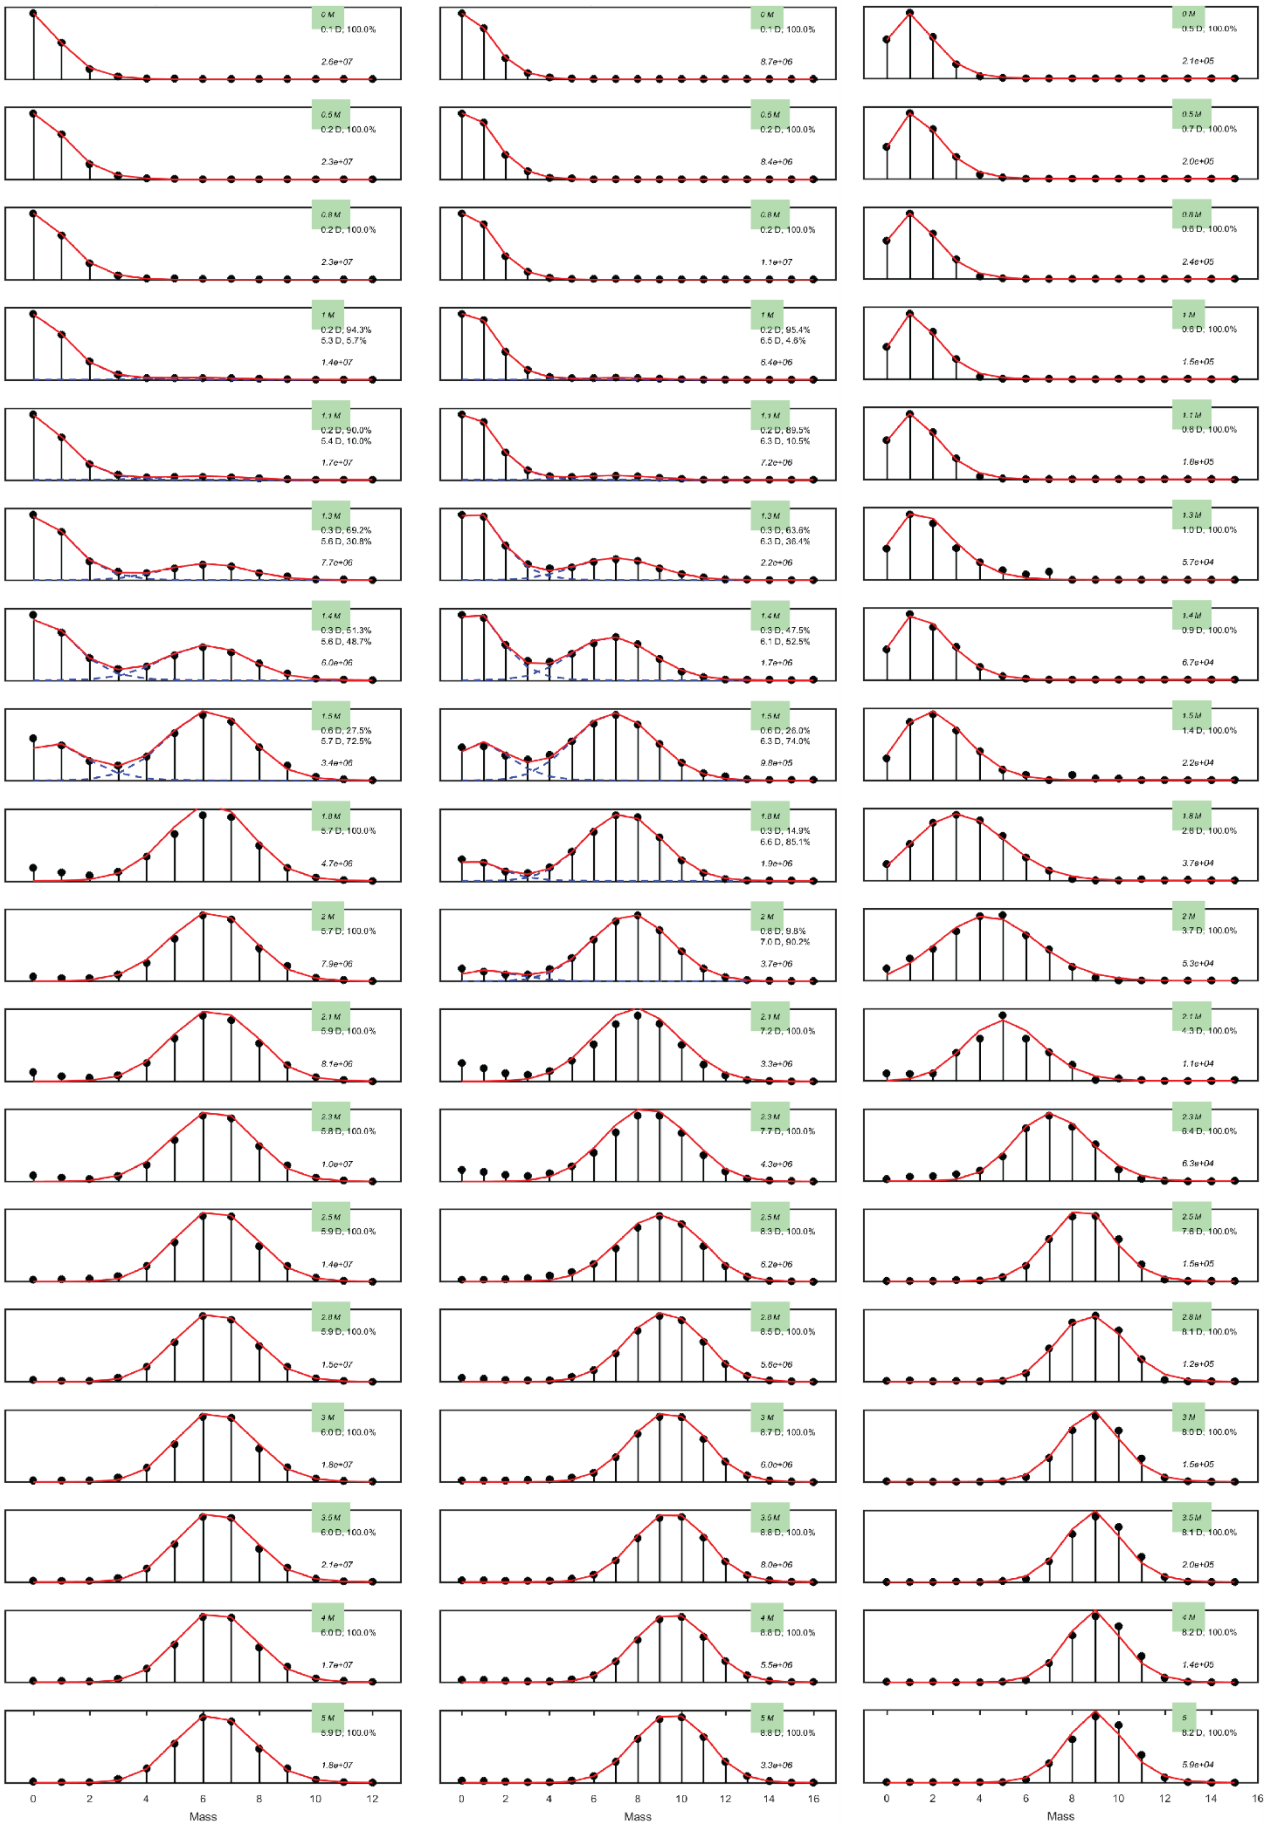

Supplementary Dataset S1

130 - 147 /  $(\beta_4)\alpha_4$

132 - 149 /  $\alpha_4$

132 - 142 /  $\alpha_4$

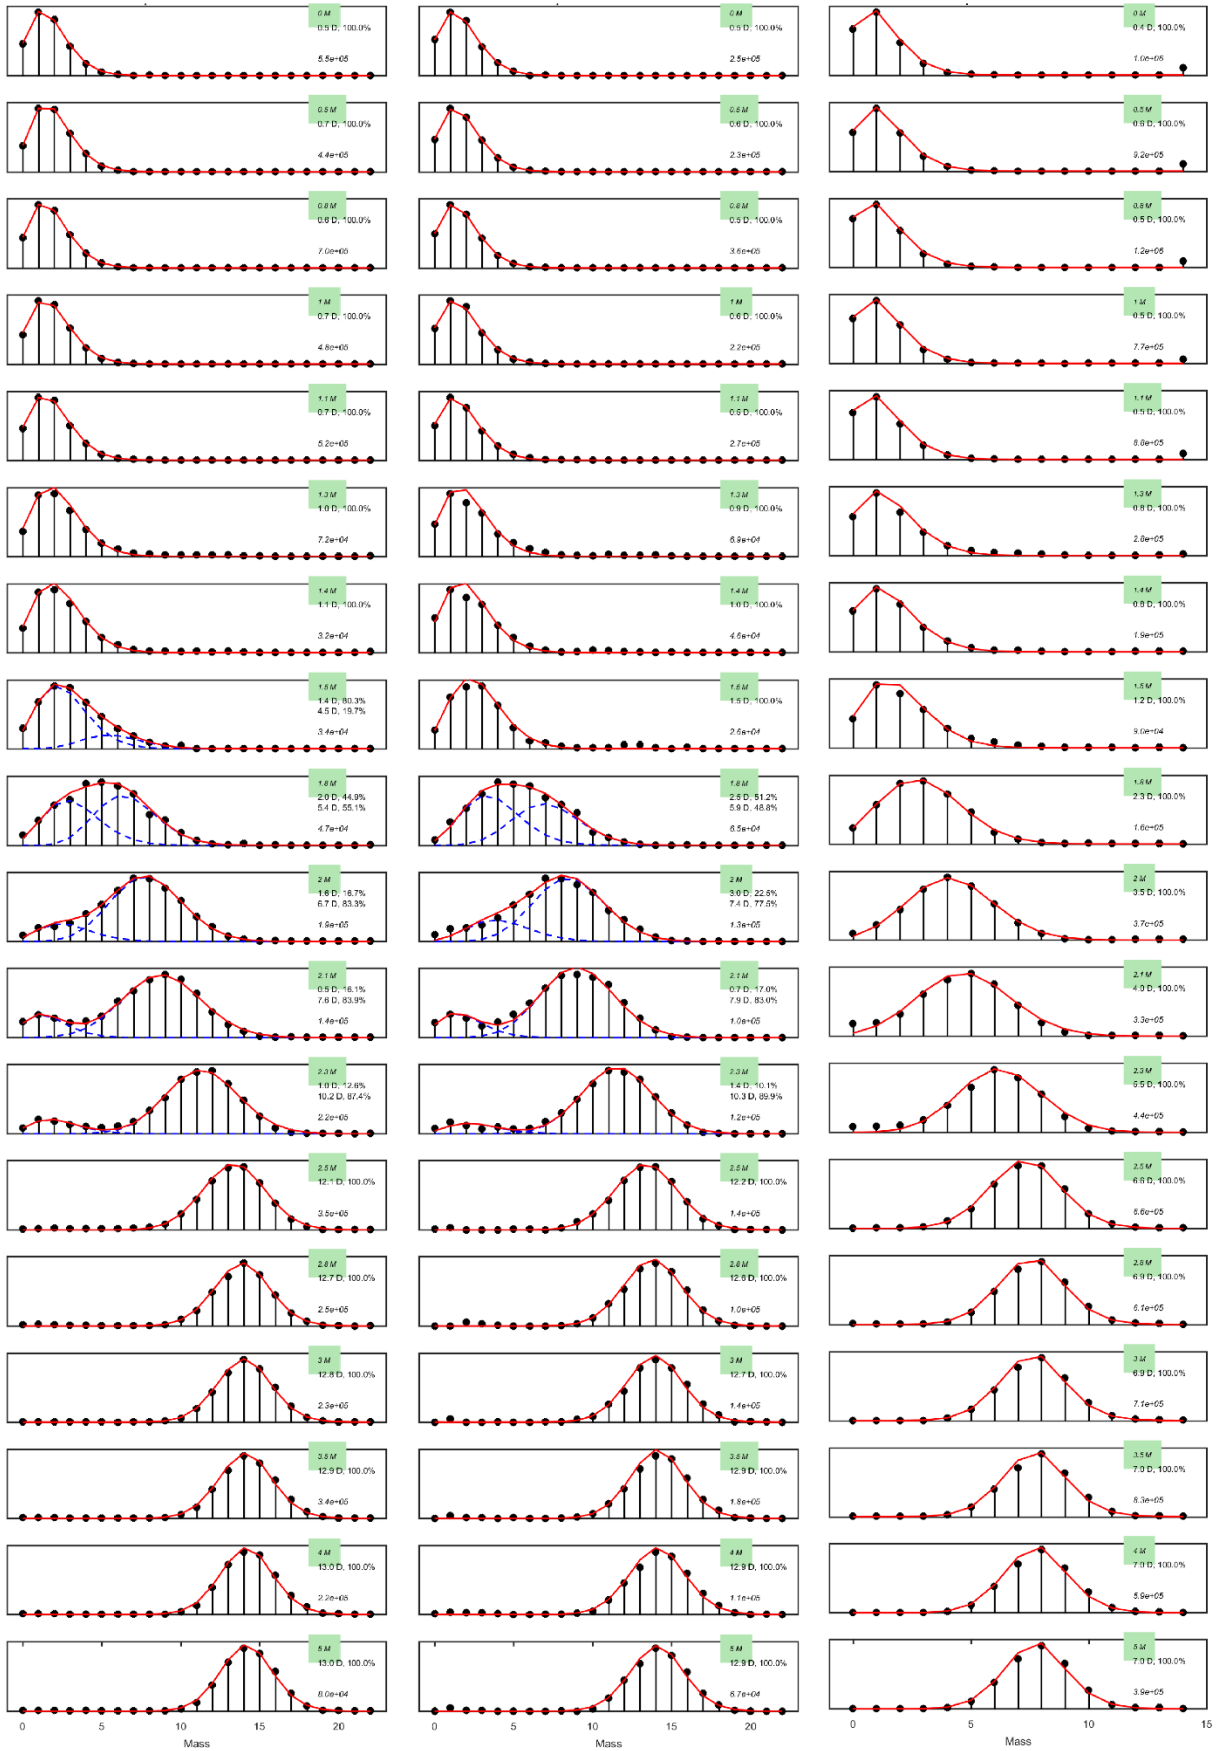

Supplementary Dataset S1

143 - 149 /  $\alpha_4$

148 - 155 /  $\alpha_4$

169 - 179 / ( $\alpha_5$ )  $\beta_6$

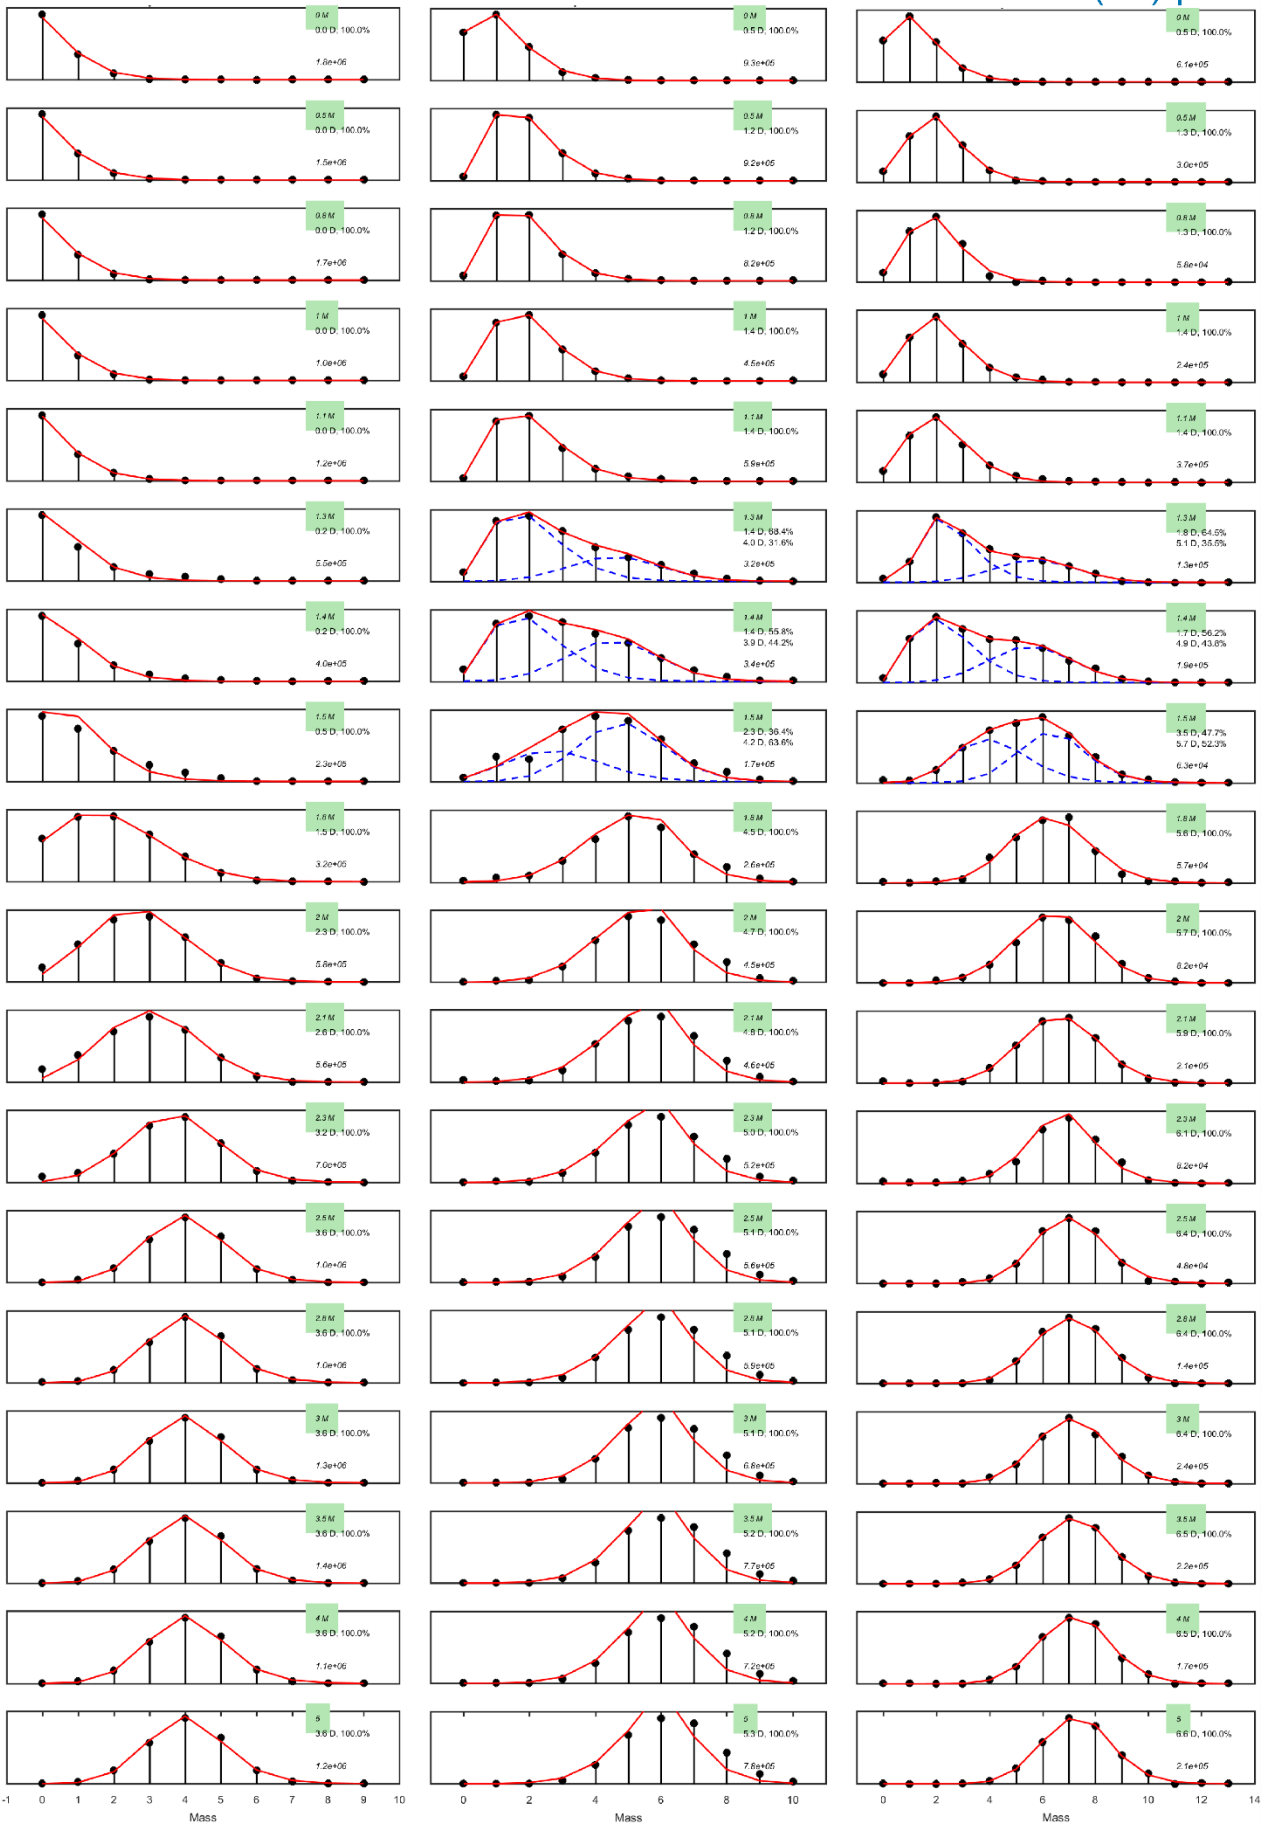

Supplementary Dataset S1

194 - 204 /  $\alpha_6$

206 - 230 /  $\beta_7\alpha_7\beta_8$

237 - 246 /  $\alpha_8\beta_8$

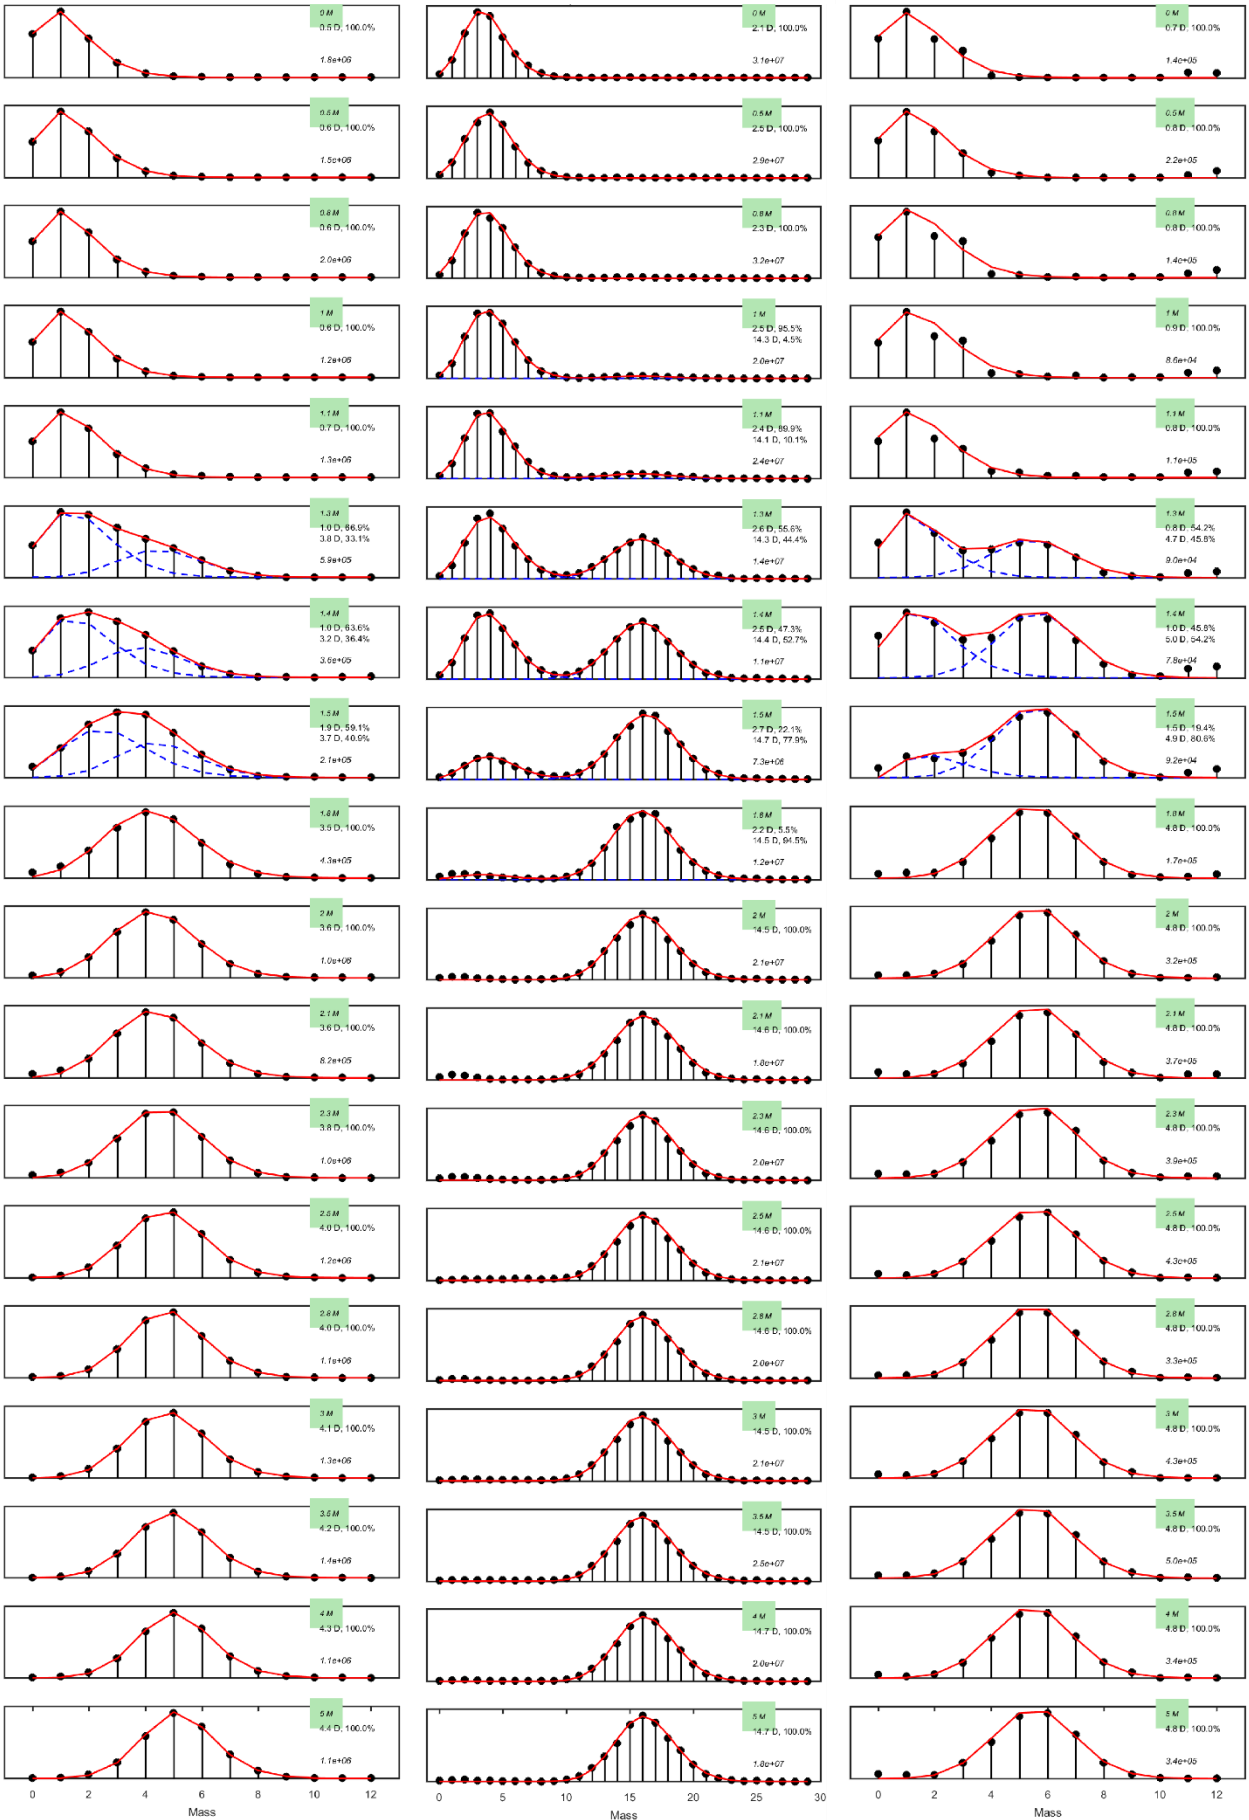

Supplementary Dataset S1
